# Supplementary material
Source: publisher figshare collection journal article supplement (https://gsapubs.figshare.com/ndownloader/files/22411767)
Supplement: Supplementary file 1 [file 22411767]

## Sheet: Geochron summary - Table S1.
Berkelhammer et al - Table S1.
TCR= 28.619 Ma	Renne et al., 2010
Bedrock=Single and Multi Grain Fusions
Weighted average of J from standards = 1.185e-04 +/- 5.157e-07
	40Ar/39Ar	+/-	37Ar/39Ar	+/-	36Ar/39Ar	+/-	% Atm.	+/-	Ca/K	+/-	Cl/K	+/-	40*/39K	+/-	Age	+/-
Sample name	meas.		meas.		meas.		40Ar								(Ma)	(Ma)	Volts	# Grains
SB-18	107.101	1.40179	1.30662	0.0317	0.0499	0.00564	13.6701	1.54786	2.39968	0.05827	0.01723	0.00131	92.5203	2.05786	19.65	0.43	0.28241	1
SB-19	117.74	0.91603	1.64265	0.01889	0.02767	0.00298	6.83147	0.74712	3.01753	0.03474	0.00397	0.00072	109.796	1.22948	23.29	0.26	0.59613	1
SB-20	115.135	1.24705	0.61372	0.01685	0.03815	0.00509	9.75096	1.30215	1.12657	0.03095	0.00586	0.00092	103.927	1.87709	22.06	0.4	0.45225	1
Bedrock WR 11-24B16 #19-#38
Weighted average of J from standards = 1.121e-04 +/- 6.859e-07
	40Ar/39Ar	+/-	37Ar/39Ar	+/-	36Ar/39Ar	+/-	% Atm.	+/-	Ca/K	+/-	Cl/K	+/-	40*/39K	+/-	Age	+/-
Sample name	meas.		meas.		meas.		40Ar								(Ma)	(Ma)	Volts	# Grains
SB-23	169.39	0.9231	0.77026	0.00733	0.19419	0.00296	33.8439	0.48586	1.4141	0.01346	0.00276	0.00029	112.103	1.03484	22.5	0.21	2.08323	1
SB-24	112.552	0.75894	1.07951	0.01289	0.00911	0.00231	2.31385	0.60686	1.98226	0.02368	0.00533	0.00028	110.003	1.00988	22.08	0.2	1.26755	1
SB-28	103.716	1.41191	1.8111	0.03282	0.0406	0.00772	11.4256	2.19398	3.32738	0.06037	0.1047	0.00176	91.9568	2.60232	18.48	0.52	0.33892	1
SB-29	113.926	1.37031	2.85686	0.04924	0.02867	0.0069	7.23221	1.78696	5.25254	0.09072	0.00869	0.00108	105.873	2.40657	21.26	0.48	0.32514	1
SB-30	116.356	1.32013	2.08605	0.03018	0.02939	0.00546	7.31766	1.38363	3.83326	0.05554	0.01001	0.00055	107.973	2.02703	21.68	0.4	0.52542	1
SB-31	131.533	2.18092	2.3824	0.05045	0.07979	0.0087	17.7811	1.93312	4.37874	0.09288	0.01539	0.00139	108.303	3.12099	21.74	0.62	0.27654	1
SB-34	144.759	0.66826	0.03288	0.00218	0.08625	0.00166	17.6078	0.32884	0.06034	0.00399	0.00071	0.00018	119.248	0.72955	23.92	0.15	3.59892	2
SB-36	182.144	2.78666	3.16466	0.05405	0.2189	0.00946	35.3756	1.4378	5.81973	0.09962	0.01528	0.00114	117.954	3.19347	23.67	0.64	0.4959	1
SB-37	272.471	9.5661	10.4815	0.40731	0.45504	0.05202	49.0376	5.37178	19.3755	0.75854	0.08773	0.01012	139.878	15.5572	28.03	3.09	0.10426	1
SB-39	156.724	0.98132	5.11182	0.0411	0.11856	0.00365	22.0898	0.67514	9.41347	0.07595	0.00389	0.00048	122.523	1.3203	24.58	0.26	1.06856	1
SB-41	102.116	0.37957	0.37092	0.00534	0.01358	0.00179	3.90053	0.51692	0.68076	0.0098	0.01553	0.00043	98.13	0.6433	19.71	0.13	1.27402	1
Weighted average of J from standards = 1.097e-04 +/- 4.804e-07
	40Ar/39Ar	+/-	37Ar/39Ar	+/-	36Ar/39Ar	+/-	% Atm.	+/-	Ca/K	+/-	Cl/K	+/-	40*/39K	+/-	Age	+/-
Sample name	meas.		meas.		meas.		40Ar								(Ma)	(Ma)	Volts	# Grains
SB-43	156.252	0.60447	0.50341	0.00516	0.13343	0.0023	25.213	0.42523	0.92401	0.00948	0.00274	0.00027	116.876	0.8109	22.95	0.16	1.99374	1
SB-45	105.089	0.47711	0.29121	0.00447	0.00539	0.00119	1.49384	0.33589	0.53444	0.0082	0.00654	0.0002	103.511	0.58885	20.34	0.12	1.79464	1
SB-46	213.619	1.08611	1.58487	0.01184	0.33354	0.004	46.0834	0.50439	2.91129	0.02177	0.00595	0.00037	115.289	1.23356	22.64	0.24	3.02143	1
SB-47	129.829	0.45764	0.37185	0.00668	0.05762	0.00127	13.0933	0.28575	0.68247	0.01226	0.01124	0.00028	112.834	0.5492	22.17	0.11	2.28585	1
SB-48	161.512	0.9162	1.35641	0.01702	0.174	0.00496	31.7722	0.89463	2.49122	0.03128	0.07306	0.00124	110.282	1.59041	21.67	0.31	1.21188	1
SB-50	551.872	11.2332	12.4581	0.27076	1.43944	0.03447	76.8928	0.98592	23.0618	0.50567	0.01497	0.00322	128.647	6.11274	25.25	1.19	0.68939	1
SB-51	220.813	3.64912	7.6084	0.13575	0.40291	0.0124	53.642	1.40374	14.0358	0.25178	0.01208	0.00157	102.904	3.56163	20.23	0.7	0.50156	1
SB-52	146.321	0.93221	1.23435	0.01552	0.15716	0.00274	31.6766	0.52069	2.26683	0.02853	0.00232	0.00029	100.038	1.00796	19.67	0.2	1.47901	1
SB-53	186.634	1.34334	4.51393	0.04285	0.26683	0.00799	42.0543	1.23238	8.30892	0.07912	0.00892	0.0014	108.475	2.44696	21.31	0.48	0.64253	1
SB-54	200.707	1.08624	1.84276	0.02034	0.34914	0.00518	51.3355	0.71805	3.38561	0.03742	0.00581	0.00045	97.7857	1.55016	19.22	0.3	1.67899	1
SB-55	128.178	0.6054	1.86382	0.01638	0.10646	0.00248	24.4286	0.56202	3.42435	0.03014	0.0028	0.00036	96.9709	0.8592	19.07	0.17	1.69465	1
Weighted average of J from standards = 1.028e-04 +/- 5.880e-07
	40Ar/39Ar	+/-	37Ar/39Ar	+/-	36Ar/39Ar	+/-	% Atm.	+/-	Ca/K	+/-	Cl/K	+/-	40*/39K	+/-	Age	+/-
Sample name	meas.		meas.		meas.		40Ar								(Ma)	(Ma)	Volts	# Grains
15JB15	169.282	0.73957	0.41763	0.00551	0.12943	0.00234	22.5778	0.40307	0.76653	0.01012	0.00281	0.00036	131.077	0.91824	24.13	0.17	2.15113	1
15JB16	182.63	1.29082	0.27602	0.01118	0.162	0.00455	26.203	0.71657	0.50656	0.02052	0.00555	0.00081	134.78	1.63428	24.81	0.3	1.1863	1
15JB17	246.092	1.55589	1.7093	0.02523	0.35786	0.00757	42.9183	0.86986	3.14011	0.0464	0.00582	0.00052	140.626	2.32843	25.87	0.43	1.78603	1
15JB20	217.129	3.81991	8.05384	0.1521	0.32331	0.01241	43.7004	1.50274	14.8622	0.28228	0.00507	0.001	122.925	3.94077	22.64	0.72	0.60291	1
15JB27	136.716	0.93072	0.48234	0.01044	0.04134	0.00199	8.90864	0.42749	0.88533	0.01916	0.00248	0.00028	124.552	1.03603	22.94	0.19	1.70124	1
15JB28	148.603	0.94232	0.22925	0.00545	0.07694	0.00203	15.2897	0.39226	0.4207	0.01001	0.00447	0.00042	125.877	0.99239	23.18	0.18	1.90485	1
15JB30	558.014	4.82378	1.56067	0.02184	1.43895	0.01578	76.1815	0.51644	2.86677	0.04016	0.00329	0.00063	133.05	3.10997	24.49	0.57	3.8934	1
15JB31	313.227	2.1183	2.85109	0.03531	0.63146	0.00944	59.5031	0.803	5.24192	0.06505	0.00351	0.00087	127.091	2.68108	23.4	0.49	1.97047	1
15JB34	272.158	2.53092	1.02355	0.01409	0.43251	0.00868	46.9344	0.83907	1.87943	0.02589	0.00279	0.0012	144.511	2.66314	26.58	0.49	2.00045	1
15JB37	117.902	1.68345	0.55076	0.02292	0.03889	0.00831	9.71048	2.07908	1.01096	0.0421	0.00946	0.00163	106.468	2.88584	19.62	0.53	0.36308	1
15JB38	128.55	0.43864	0.06109	0.00183	0.00741	0.0005	1.70062	0.11474	0.11209	0.00336	0.00038	0.00016	126.34	0.45586	23.26	0.08	4.78694	1
15JB39	153.147	0.88566	0.926	0.01074	0.09293	0.00258	17.8855	0.4885	1.7002	0.01973	0.00112	0.00058	125.814	1.04831	23.17	0.19	1.41786	1
Weighted average of J from standards = 1.0173e-04 +/- 5.880e-07
	40Ar/39Ar	+/-	37Ar/39Ar	+/-	36Ar/39Ar	+/-	% Atm.	+/-	Ca/K	+/-	Cl/K	+/-	40*/39K	+/-	Age	+/-
Sample name	meas.		meas.		meas.		40Ar								(Ma)	(Ma)	Volts	# Grains
15JB39	153.147	0.88566	0.926	0.01074	0.09293	0.00258	17.8855	0.4885	1.7002	0.01973	0.00112	0.00058	125.814	1.04831	22.92	0.19	0.71282	1
15JB40	174.236	1.88216	1.4527	0.02841	0.10768	0.005	18.1975	0.82776	2.66825	0.05224	0.00475	0.00129	142.651	2.1238	25.96	0.38	1.49671	1
15JB41	162.652	0.97557	0.83701	0.01272	0.1136	0.0025	20.6006	0.43844	1.53672	0.02336	0.00274	0.00084	129.197	1.06252	23.53	0.19	1.69722	1
15JB45	144.173	2.8299	2.26494	0.06067	0.05381	0.00918	10.902	1.87067	4.16252	0.11168	0.00725	0.00235	128.634	3.70312	23.43	0.67	0.55504	1
15JB46	187.396	2.24139	0.97289	0.03411	0.23972	0.0081	37.7643	1.19923	1.78635	0.06267	0.00309	0.00163	116.689	2.65756	21.27	0.48	2.31336	1
Weighted average of J from standards = 1.006e-04 +/- 6.896e-07
	40Ar/39Ar	+/-	37Ar/39Ar	+/-	36Ar/39Ar	+/-	% Atm.	+/-	Ca/K	+/-	Cl/K	+/-	40*/39K	+/-	Age	+/-
Sample name	meas.		meas.		meas.		40Ar								(Ma)	(Ma)	Volts	# Grains
15JB20LATUFF	170.626	1.90001	0.03584	0.01993	0.06021	0.00554	10.427	0.95201	0.06576	0.03657	0.00052	0.00073	152.812	2.35483	27.5	0.42	0.61143	2
MINIVOLCANO	416.258	15.8662	1.87718	0.14078	0.83965	0.06258	59.5733	3.82609	3.44893	0.259	0.03324	0.00698	168.491	17.2154	30.3	3.07	0.24858	1
Weighted average of J from standards = 1.338e-04 +/- 1.605e-06
	40Ar/39Ar	+/-	37Ar/39Ar	+/-	36Ar/39Ar	+/-	% Atm.	+/-	Ca/K	+/-	Cl/K	+/-	40*/39K	+/-	Age	+/-
Sample name	meas.		meas.		meas.		40Ar								(Ma)	(Ma)	Volts	# Grains
32LA	101.2	0.84249	0.51955	0.00772	0.0275	0.00279	7.98961	0.81325	0.95366	0.01418	0.00311	0.00068	93.1218	1.13331	22.31	0.27	1.10177	1
43LA	121.017	1.1707	0.45489	0.0116	0.09777	0.00279	23.8481	0.644	0.83492	0.02131	0.00245	0.00113	92.1639	1.19329	22.08	0.28	1.02128	1

## Sheet: Geochemistry - Table S2.
Berkelhammer et al - Table S2.
Major and trace element geochemistry. Major elements reported raw in wt. % and trace elements in ppm
Only the freshest rocks were targeted for collection and further processing/analysis . Weathered surfaces were removed from samples larger than fist size, which were then split into smaller pieces using a RockLabs Hydraulic Press and these pieces were powdered using a Spex Industries Shatterbox (alumina vessel; following Brueseke et al., 2017). For the most part, measured analytical totals lie be…
Measured Fe2O3 was split into Fe+2 and Fe+3 according to Le Maitre (1976) and any major element data used in diagrams and the discussion are reported as anhydrous using the split iron data.
Franklin and Marshall College XRF via a Panalytical PW 4204 XRF spectrometer, following the methods outlined in Mertzman (2000, 2015) and online at http://www.fandm.edu/earth-environment/laboratory-facilities/.
Samples analyzed for major, trace, and rare earth elements at Washington State University via XRF and ICP-MS using a ThermoARL Advant'XP+ sequential X-ray fluorescence spectrometer and an Agilent 7700 ICP-MS (rare earth elements) following the methods of Johnson et al. (1999) and Gaschnig et al. (2011).
Brueseke, M.E., Downey, A.C., Dodd, Z.C., Hart, W.K., Adams, D.C., and Benowitz, J.A., 2017, The leading wisps of Yellowstone: Post-ca. 5 Ma extension-related magmatism in the upper Wind River Basin, Wyoming (USA) associated with the Yellowstone hotspot tectonic parabola: Geosphere. DOI: https://doi.org/10.1130/GES01553.1
Gaschnig, R.M., Vervoort, J.D., Lewis, R.S., and Tikoff, B., 2011, Isotopic evolution of the Idaho Batholith and Challis intrusive province, northern US Cordillera: Journal of Petrology, v. 52, no. 12, p. 2397-2429.
Johnson, D.M., Hooper, P.R., and Conrey, R.M., 1999, XRF Analysis of Rocks and Minerals for Major and Trace Elements on a Single Low Dilution Li-tetraborate Fused Bead:Advances in X-ray Analysis, v. 41, p. 843-867.
Katoh, S., Beyene, Y., Tetsumaru, I., Hyodo, H., Hyodo, M., Yagi, K., Gouzu, C., WoldeGabriel, G., Hart, W.K., Ambrose, S.H., Nakaya, H., Bernor, R.L., Boisserie, J-R., Bibi, F., Saegusa, H., Sasaki, T., Sano, K., Asfaw, and B, Suwa, G., 2016, New geological and palaeontological age constraint for the gorilla-human lineage split: Nature, v. 530, p. 215-218, 10.1038/nature16510.
Le Maitre R.W., 1976, The chemical variability of some common igneous rocks: Journal of Petrology, v. 17, p. 589-637.
Mertzman, S.A., 2000, K-Ar results from the southern Oregon-northern California Cascade Range: Oregon Geology, v. 62, p. 99-122
Mertzman, S. A., 2015, XRF Laboratory: Overview and Analytical Procedures. http://www.fandm.edu/earth-environment/laboratory-facilities/instrument-use-and-instructions. Accessed 3/21/2017.
Washington State XRF - collected by Berkelhammer, Brueseke, Benowitz, Trop, and Davis (UTM coordinates zone 12T NAD27 CONUS datum), n = 46																										Washington State ICP-MS
Sample	Unit	UTM Easting or Latitude N (deg)	UTM Northing or Longitude W (deg)	SiO2	TiO2	AI2O3	Fe2O3	MnO	MgO	CaO	Na2O	K2O	P2O5	Total	LOI	Ni	Cr	Sc	V	Ba	Rb	Sr	Zr	Nb	Y	Cs	U	Pb	Th	Hf	Ta	La	Ce	Pr	Nd	Sm	Eu	Gd	Tb	Dy	Ho	Er	Tm	Yb	Lu
SB15-17	Cabin Creek	07 v 0403900	6895365	56.4949	1.59548	16.4092	8.59903	0.134789	2.87042	5.93017	4.50688	2.03288	0.589109	98.2869	1.2636	18.513	16.632	17.4337	160.38	555.038	36.5808	547.156	326.688	15.5456	38.5837	0.987453	1.89687	6.85246	4.91349	7.63687	1.06442	31.4803	67.769	8.62531	35.371	8.03948	2.21845	7.76913	1.23938	7.63703	1.50981	4.06176	0.593693	3.67281	0.561455
SB15-18	Cabin Creek	07 v 0486570	6864269	59.9091	1.02019	17.1125	6.05455	0.0936892	2.58369	5.71725	4.04254	2.05462	0.289893	98.2612	0.960867	29.1535	27.064	12.9072	125.469	524.666	32.7719	568.303	177.135	8.82924	20.0864	0.869365	1.42829	6.05588	3.3616	4.28321	0.671192	18.6457	37.715	4.64887	18.6701	4.11546	1.30799	4.06758	0.653379	3.99218	0.780775	2.08981	0.302194	1.89399	0.289821
SB15-19	Cabin Creek	07 v 0486666	6864143	59.2308	1.05588	17.8167	6.5411	0.0868725	2.27118	5.84677	4.71523	1.42872	0.284506	98.6114	1.14313	19.899	11.979	12.983	137.214	482.265	25.0239	527.539	205.337	10.4717	23.7966	0.337625	1.39029	5.13434	3.31583	4.71839	0.763531	20.7238	41.1558	5.05301	20.0418	4.52153	1.43019	4.55785	0.753712	4.63379	0.930901	2.51209	0.359854	2.29467	0.359906
SB15-20	Cabin Creek	07 v 0486637	6864171	63.241	0.889898	16.5907	5.66444	0.0682014	1.48717	4.04019	4.99855	2.02121	0.256435	98.6808	0.97041	9.456	6.2055	9.74435	75.451	610.933	40.5594	395.733	302.565	13.6496	26.1	0.661521	2.22407	7.33076	5.14869	6.73943	1.09018	24.9811	49.5914	5.98346	22.9101	5.00978	1.42168	4.87121	0.792509	4.9373	1.01807	2.83282	0.41452	2.6791	0.421243
SB15-21	Cabin Creek	07 v 0486709	6864000	63.9625	0.881803	16.9686	4.95973	0.0640926	1.06567	4.02573	5.11442	2.09269	0.249817	98.8798	1.09677	9.9	4.851	9.22566	90.486	629.94	42.6563	404.462	309.74	13.7431	24.29	0.735994	2.35912	7.18449	5.28536	6.93349	1.08821	24.36	50.2148	5.75253	22.1184	4.77895	1.44925	4.65808	0.7492	4.51706	0.92906	2.57134	0.377153	2.42096	0.374869
SB15-22	Cabin Creek	07 v 0486724	6863891	63.5518	0.881625	16.3598	5.85553	0.0755271	1.20852	3.90918	5.01175	2.0983	0.257697	98.6132	1.01682	10.692	4.95	9.27566	84.249	618.042	43.0252	380.411	307.464	13.7067	25.7712	0.90739	2.21635	7.28775	5.20772	6.88355	1.09132	24.9253	50.0303	5.97087	22.8642	4.93147	1.438	4.72729	0.784542	4.97799	1.00529	2.71966	0.402403	2.61761	0.422616
SB15-23	Cabin Creek	07 v 0486702	6863746	63.2755	0.854816	16.5905	5.7291	0.102366	1.66498	4.21727	5.0594	1.99414	0.249817	99.1544	0.468066	11.682	4.257	9.6244	71.775	604.792	41.4128	408.326	300.179	13.3956	27.1344	0.60418	2.20355	6.6757	5.07468	6.70083	1.05808	25.1723	49.1968	5.92415	22.7115	4.82089	1.44856	4.85947	0.806307	5.0597	1.02708	2.86925	0.422996	2.82581	0.43709
SB15-24	Cabin Creek	07 v 0486592	6863706	59.1868	1.21522	17.6744	6.85241	0.110395	1.69958	5.33974	4.96581	1.53066	0.387248	98.2643	1.05181	11.385	1.485	13.4176	125.532	552.838	27.3116	568.192	231.729	11.2389	29.175	0.360435	1.47469	7.38305	3.63071	5.34332	0.83197	23.4027	46.4107	5.87571	23.6401	5.28065	1.62632	5.3598	0.857677	5.30881	1.09175	2.97259	0.432031	2.72659	0.427259
SB15-25	Cabin Creek	07 v 0486494	6863542	62.5862	1.11707	17.5272	5.07894	0.048411	1.05675	4.54864	5.17289	1.73503	0.299287	98.6531	0.874192	8.415	2.673	11.7824	114.147	609.783	32.4877	495.73	242.655	11.3477	23.9261	0.456018	1.61362	5.60578	3.9817	5.48156	0.866055	22.8612	45.4233	5.57047	21.8062	4.87433	1.56739	4.78501	0.78718	4.73725	0.93845	2.54471	0.367252	2.29373	0.3467
SB15-26	Cabin Creek	07 v 0486464	6863514	63.8558	1.18322	15.663	5.59999	0.105887	1.50669	3.51998	5.29648	2.41366	0.388129	98.9624	0.652811	3.0535		11.7756	87.7635	602.613	46.4128	410.032	302.706	13.9061	31.4098	0.517829	2.07977	7.13294	4.96449	7.13128	0.984404	26.272	54.2533	6.88413	27.7095	6.12796	1.75026	5.94342	0.981794	6.04028	1.20762	3.30819	0.485874	3.1654	0.476133
SB15-27	Cabin Creek	07 v 0485795	6862121	64.264	1.14436	15.5482	5.47151	0.103228	1.37572	3.36505	5.33078	2.50043	0.358166	98.9041	0.60252	3.8415		11.9085	84.2175	609.447	49.8401	397.039	312.583	14.1323	32.2629	0.598643	2.10859	8.06894	5.12266	7.18935	0.998672	26.6879	55.288	6.91002	27.4622	6.16462	1.71231	5.99063	0.981391	6.12864	1.23744	3.38236	0.50355	3.27611	0.515939
SB15-28	Cabin Creek	07 v 0486464	6863514	59.0947	1.75269	15.3475	8.55127	0.124957	2.43096	5.17822	4.81499	2.01668	0.680458	99.1214	0.516055	3.743		18.0875	187.052	533.484	31.5261	483.454	237.29	11.3185	32.0301	0.80902	1.37819	5.89515	3.23259	5.59656	0.784406	23.6941	51.5674	6.72661	28.2893	6.72641	1.90834	6.54832	1.04244	6.32441	1.25485	3.33082	0.480622	3.00695	0.459229
SB15-29	Cabin Creek	07 v 0485852	6862172	57.1095	1.10877	16.3117	7.43436	0.111276	4.33664	6.83217	4.16237	1.47528	0.331848	98.4566	0.686767	57.321	100.089	18.2898	153.45	442.361	31.3043	517.998	201.945	10.2107	23.0673	0.576749	1.50491	5.05934	3.46734	4.74787	0.737143	21.0633	43.127	5.35643	21.4037	4.64872	1.39321	4.53462	0.742828	4.44919	0.885087	2.4152	0.35376	2.21738	0.348561
SB15-31	Cabin Creek	07 v 0485859	6862309	56.0251	1.05208	16.3961	7.75261	0.116523	5.05752	7.38816	3.99865	1.44413	0.29902	98.7402	0.549159	63.063	139.392	20.5015	165.33	386.112	30.862	573.978	186.795	8.65662	22.4778	0.525454	1.32852	4.42789	3.18195	4.4412	0.625806	18.4219	38.2422	4.81291	19.3501	4.51641	1.33154	4.33756	0.713758	4.41351	0.892976	2.39256	0.344782	2.17542	0.32668
SB15-32	Cabin Creek	07 v 0485891	6862349	55.0085	1.02597	17.344	7.37202	0.140872	4.40877	8.1894	3.90777	0.960334	0.224492	97.8311	1.22324	69.252	77.013	21.0643	163.081	315.365	16.1639	466.889	147.238	5.76079	21.8917	0.100295	0.875518	2.58235	2.15742	3.50802	0.417175	13.3888	28.8698	3.76671	15.9123	3.82598	1.28875	4.10633	0.681762	4.23979	0.86938	2.38751	0.336446	2.13903	0.345064
SB15-34	Ptarmigan Creek	07 v 0485940	6862401	75.3305	0.0707256	13.6157	0.813487	0.0906444	0.134234	0.735035	3.74203	3.80152	0.0696168	98.3206	1.53033	3.168	3.069	2.96047	6.93	835.358	101.683	116.204	54.0435	16.7932	12.299	2.0775	3.58597	12.1783	4.06666	2.28465	1.86354	6.63615	13.4327	1.58421	5.47809	1.46395	0.204098	1.5722	0.314594	2.03556	0.410587	1.12841	0.174833	1.1212	0.163531
SB15-39	Flat Top	07 v 0489056	6858382	48.4816	1.37245	16.6548	10.807	0.162647	8.39078	9.14198	3.33822	0.600732	0.289545	98.1389	1.5327	139.392	282.15	30.8236	206.811	215.23	8.55458	540.341	107.794	8.94343	23.0757	0.101378	0.361561	2.03393	1.02977	2.65729	0.568058	12.1106	26.9215	3.65826	16.2341	4.19983	1.52438	4.21675	0.725691	4.57611	0.923947	2.50722	0.359103	2.22678	0.363347
SB15-40	Flat Top	07 v 0487798	6857840	69.6941	0.67422	14.4406	3.15377	0.0708444	0.408929	1.42271	5.2387	3.27514	0.10296	98.1606	0.705882	4.059	1.584	7.53324	28.215	834.346	66.4735	189.415	456.997	14.9019	41.8838	0.660537	3.00236	11.045	7.07787	10.9647	1.052	33.3864	68.9267	9.11859	35.9439	7.98084	1.7013	7.50432	1.26758	7.89673	1.61626	4.46022	0.670848	4.29048	0.676482
SB15-41	Flat Top	07 v 0487836	6857984	65.9563	1.16665	14.9546	5.34126	0.0632016	0.77122	2.73642	5.18965	2.70295	0.322037	98.6602	1.37856	2.475		11.3592	52.569	755.66	57.3032	318.218	380.705	13.6058	52.2355	2.00515	2.55234	8.58555	5.73164	9.21904	0.965867	33.2732	64.4836	9.28951	37.823	8.56312	2.07209	8.41559	1.42871	8.73545	1.84324	5.03694	0.747828	4.61266	0.726282
SB14-42	Flat Top	07 v 0487926	6858099	67.6829	0.984456	14.6422	4.39863	0.0639441	0.771507	2.20867	5.26735	2.95477	0.236759	98.7632	0.97981	5.742		9.80656	38.016	812.926	60.8994	267.579	410.558	14.483	42.4364	0.810713	2.75149	7.83939	6.24084	9.96677	1.03662	31.9164	67.5636	8.8721	35.5163	7.94011	1.90488	7.4238	1.22945	7.61006	1.58354	4.37048	0.629135	4.02502	0.645664
SB15-43	Ptarmigan Creek	07 v 0492721	6858777	59.9429	0.92462	16.3963	5.64799	0.123334	2.72883	5.17169	4.38587	1.7605	0.226225	96.7329	2.95034	24.255	30.195	13.1718	111.573	639.226	29.9789	501.112	208.882	9.32481	21.5899	0.417142	1.79947	7.87552	4.30962	4.92108	0.759238	21.035	41.8887	4.99321	19.4813	4.25819	1.3391	4.0242	0.67353	4.16205	0.843409	2.29455	0.338182	2.16823	0.341751
SB15-45	Ptarmigan Creek	07 v 0492754	6858664	69.6524	0.332274	13.6906	2.08632	0.0385011	0.704276	2.32778	3.5831	3.14903	0.0737352	95.4255	3.43688	8.217	5.148	3.67127	27.324	691.057	74.2856	228.657	178.497	9.54732	13.9036	1.12307	2.92026	9.0201	7.8322	4.72344	0.885777	20.4783	36.4809	4.037	13.8099	2.67766	0.659367	2.289	0.393604	2.40584	0.505618	1.47283	0.227945	1.51602	0.250056
SB15-46	Ptarmigan Creek	07 v 0493185	6858351	52.9265	1.37407	17.1784	8.21911	0.178735	3.40154	8.53536	3.61554	1.28591	0.369181	96.2471	3.11178	44.352	38.511	19.5415	173.25	375.801	20.3557	542.582	237.563	10.1528	29.3439	4.32555	1.35985	4.98985	3.32495	5.44763	0.742754	20.8506	45.259	5.81371	23.9137	5.51171	1.71878	5.57035	0.929376	5.67797	1.15579	3.13807	0.438959	2.7732	0.440325
SB15-47	Ptarmigan Creek	07 v 0493642	6859355	64.6583	0.684526	16.3092	4.94412	0.0841104	1.80726	4.16824	4.65551	1.87117	0.188159	98.867	0.734523	17.028	14.751	9.57847	95.634	528.092	41.3343	484.753	215.612	7.89343	19.6831	0.788615	1.36094	6.55102	3.59308	5.32852	0.607311	17.5854	36.0004	4.38257	17.2155	3.8476	1.04154	3.56494	0.611218	3.67752	0.740071	2.08277	0.296859	1.92574	0.30961
SB15-48	Ptarmigan Creek	07 v 0493183	6859903	56.1817	1.10142	18.0823	7.8087	0.120138	3.18966	6.33569	4.49151	1.17554	0.302967	97.9942	1.84551	16.366	7.644	13.8797	152.782	428.823	24.3748	571.701	165.211	8.0186	22.3299	0.85119	1.12919	4.4053	2.55751	3.89916	0.604015	16.1027	34.1251	4.35758	18.064	4.20077	1.43177	4.33423	0.712742	4.40531	0.897686	2.40957	0.342325	2.10882	0.340037
SB15-51	Young Creek	07 v 0482778	6852738	55.5154	0.993138	16.3389	7.04797	0.108276	5.68258	8.01927	3.49823	0.465429	0.247847	97.1991	2.35326	123.849	183.15	18.8313	154.737	287.05	7.07278	566.449	147.532	5.88141	18.834	0.194297	0.897054	2.89315	1.9758	3.50304	0.461495	13.8048	29.0888	3.69594	15.3057	3.60705	1.2099	3.66685	0.616331	3.67501	0.748579	2.01149	0.289499	1.81341	0.278112
SB15-52	Young Creek	07 v 0482784	6852788	59.1012	0.883278	16.654	5.83548	0.0897831	3.08584	6.28015	3.49855	1.38511	0.197752	96.4166	2.89102	37.62	48.213	14.8553	119.988	470.54	25.1222	560.331	145.565	6.34431	18.7186	1.3283	1.19411	3.51573	2.83176	3.54689	0.499002	14.7281	30.0084	3.72553	15.1023	3.53034	1.15853	3.51741	0.574808	3.62633	0.727521	2.01637	0.282311	1.78572	0.292788
SB15-53	Young Creek	07 v 0482784	6852788	54.6452	1.276	16.7262	7.95654	0.129324	4.69413	8.3494	3.59263	0.637382	0.365538	97.5618	1.91808	60.291	96.426	20.313	163.152	448.845	7.31766	617.223	183.808	8.94788	28.1345	0.361978	1.00389	6.45019	2.25951	4.39103	0.634	17.7802	38.1207	4.91719	20.9153	5.07275	1.60189	5.10927	0.87066	5.37568	1.1064	3.00531	0.431595	2.6749	0.422799
SB15-54	Young Creek	07 v 0486364	6852946	58.4625	0.81996	16.673	6.25353	0.109171	3.49122	5.9328	4.27565	0.926763	0.240392	96.548	2.31171	47.362	33.631	14.4485	132.435	439.464	16.3675	674.677	132.434	5.85747	17.383	0.13314	1.05045	3.36699	2.38153	3.26256	0.445762	15.076	30.3815	3.76195	15.2733	3.50112	1.13757	3.34143	0.541773	3.34813	0.682434	1.86369	0.2686	1.6766	0.269655
SB15-55	Young Creek	07 v 0486364	6852946	58.7349	0.851789	16.9962	6.65905	0.104932	3.49214	6.53556	3.99531	1.30973	0.234834	98.2361	1.30804	47.3785	31.717	15.0732	134.649	485.683	20.5428	627.468	138.494	6.06351	18.0963	0.215767	1.06133	5.57561	2.48135	3.42464	0.446447	15.4606	31.0958	3.83719	15.5414	3.42493	1.14623	3.43466	0.55827	3.4571	0.709192	1.93238	0.277577	1.71311	0.265535
SB15-56	Young Creek	07 v 0488026	6852764	51.8725	1.00699	18.4783	8.2057	0.13398	5.286	8.4011	3.9671	0.48126	0.33722	97.3343	1.5809	70.3	58.3	19.7774	196.7	246.588	5.18279	812.886	32.4444	2.40559	14.435	0.0356007	0.136502	1.98585	0.354473	0.870579	0.199284	8.8029	18.9723	2.62646	11.5375	2.99564	1.25677	3.0964	0.484601	2.88601	0.579575	1.53544	0.214688	1.2747	0.193784
15JB15LA	Rocker Creek	61.8935	141.018	72.8453	0.175458	14.728	1.50391	0.0592478	0.160959	2.07339	4.38965	1.83681	0.0768792	97.6964	1.75953	3.6445	1.2805	1.33355	9.259	906.226	41.2115	379.905	125.309	6.63123	5.80575	0.982273	1.63344	8.74609	4.80597	3.25385	0.60769	18.4821	31.3913	3.23398	10.5957	1.67731	0.503253	1.23125	0.181391	1.03338	0.205175	0.568679	0.0870881	0.590527	0.0983953
15JB25LA	Rocker Creek	61.8785	141.001	49.9308	1.34932	16.138	9.95234	0.152014	7.48348	9.61994	3.41272	0.700069	0.394812	98.1197	1.0395	71.28	221.067	30.6447	206.811	288.981	9.6722	632.321	118.73	9.35951	24.2034	0.194343	0.588449	2.23371	1.47206	2.90284	0.533324	18.5023	39.788	5.22911	21.8194	5.14445	1.63992	4.83344	0.79073	4.79699	0.969978	2.60353	0.36045	2.2464	0.343922
15JB26LA	Rocker Creek	61.8789	141.003	51.8838	1.24981	14.8273	8.67707	0.127938	6.61688	9.564	2.89546	0.921561	0.380388	96.2603	3.02981	121.077	270.072	25.4447	208.395	496.287	12.7574	823.234	124.106	8.49405	20.7953	0.449218	0.968661	4.37394	2.99085	3.29128	0.541211	22.0306	47.193	6.27593	25.9272	5.56823	1.72785	4.73589	0.724531	4.15154	0.830038	2.17692	0.299406	1.8035	0.289133
15JB30LA	Rocker Creek	61.8733	141.029	63.2889	0.559271	14.9166	4.19776	0.0678249	3.35308	5.87841	3.83385	1.0221	0.134016	96.8242	2.48619	58.014	121.869	12.865	94.149	564.974	27.6302	514.538	104.834	4.50262	12.237	0.236291	1.04867	6.02491	2.23966	2.68929	0.37043	10.7294	20.8823	2.53136	10.537	2.3728	0.781665	2.3654	0.385461	2.2955	0.468817	1.30618	0.186904	1.18297	0.179678
15JB33LA	Rocker Creek	61.884	141.026	59.2733	0.886786	16.1076	5.8494	0.0931613	4.10756	5.64229	4.14399	1.18813	0.305823	97.0022	2.40299	114.26	213.844	13.7649	114.95	630.291	21.3511	745.226	128.345	9.31332	14.1205	0.375571	0.935488	4.6591	2.40192	3.10572	0.653601	17.2272	34.9017	4.31817	17.4345	3.65078	1.19237	3.24121	0.494597	2.83698	0.539598	1.41559	0.203716	1.23913	0.188046
15JB34LA	Rocker Creek	61.8872	141.022	66.5353	0.400821	15.6718	3.00375	0.0454905	1.75859	4.29693	4.47519	1.44408	0.12179	97.4477	1.92447	36.432	69.894	7.60394	61.38	740.465	38.2507	560.679	113.654	5.21418	9.24622	0.99514	1.43332	7.25747	3.03229	2.87827	0.4427	12.6967	23.4735	2.72966	10.4727	2.1565	0.688783	1.98889	0.312671	1.7964	0.355209	0.929451	0.131017	0.83013	0.128591
15JB37LA	Rocker Creek	61.8802	140.993	67.0462	0.766943	16.2984	3.27609	0.185318	0.353281	3.1276	4.99534	2.71516	0.228027	98.6586	1.31796	3.465	2.376	8.81527	57.123	664.963	54.8862	393.517	209.173	11.5283	23.4596	0.696951	2.64868	7.85622	6.0481	5.31388	0.89694	22.0746	43.1707	5.13566	20.0809	4.44476	1.27191	4.2244	0.703095	4.32755	0.901903	2.49693	0.365164	2.37275	0.391855
15JB38LA	Rocker Creek	61.8816	140.988	75.0952	0.0616701	14.0411	0.652669	0.0475112	0.202681	0.720987	3.84362	3.77511	0.058516	98.4326	1.3324	2.8855	1.791	3.13609	5.373	1285.81	95.3232	98.7662	51.9347	14.9014	11.5268	3.08295	3.17535	14.7763	5.05594	2.20834	1.61511	9.27716	18.1873	2.02838	6.89785	1.67773	0.28972	1.61743	0.297954	1.8774	0.381236	1.05198	0.161249	1.03435	0.161137
15JB39LA	Rocker Creek	61.8718	141.033	68.7637	0.297554	16.0754	2.82644	0.0289377	0.730145	3.41827	4.85963	1.40027	0.0869022	98.1993	1.62479	20.097	16.83	4.77	33.561	622.162	22.4914	517.01	75.2052	2.64345	7.27864	0.142047	0.365448	4.60993	0.919822	2.20304	0.227837	5.32097	10.5198	1.38729	5.71623	1.481	0.488676	1.55697	0.246806	1.431	0.280405	0.758007	0.108945	0.684292	0.110566
15JB40LA	Rocker Creek	61.8749	141.038	62.9892	0.602524	17.1162	4.30076	0.0389862	1.58094	4.88676	4.42006	1.51147	0.236155	97.245	1.92241	9.207	2.871	6.46621	79.398	717.844	30.4801	692.92	124.747	8.57505	11.6298	0.371119	1.25215	5.1383	2.99372	3.04057	0.627903	17.8822	33.4036	3.82645	14.4326	2.90999	0.918474	2.57048	0.394464	2.24725	0.439742	1.16068	0.173986	1.08943	0.172234
15JB42LA	Rocker Creek	61.8788	141.049	55.2714	1.14882	17.2885	7.97348	0.154192	4.04781	7.23303	4.18527	1.21861	0.306237	98.0151	1.62377	32.4065	82.149	18.8349	140.166	448.593	20.5491	570.462	203.841	10.6734	23.0219	0.379238	1.04955	4.35376	2.4624	4.42699	0.803393	18.3093	37.4109	4.72897	19.0158	4.4173	1.48774	4.37162	0.719918	4.39421	0.912486	2.49159	0.349274	2.24657	0.355666
15JB44LA	Rocker Creek	61.8873	141.033	67.2723	0.27183	15.7631	2.63561	0.0229209	0.993057	3.67548	4.81959	0.968363	0.0927575	96.2464	2.79642	47.28	83.922	6.0769	51.417	466.342	23.417	502.887	82.0022	2.44687	6.27209	0.189133	0.538487	4.15179	1.16566	2.32308	0.206707	5.7103	10.9939	1.36384	5.48509	1.38746	0.447678	1.32787	0.2036	1.22386	0.242731	0.658137	0.0943072	0.584786	0.087238
15JB45LA	Border lavas	61.8546	141.075	61.2752	0.703226	16.0458	5.354	0.0947539	2.59151	4.99289	4.06648	1.33881	0.196552	96.1139	3.18618	21.691	30.9445	12.8273	116.912	447.815	26.6318	420.882	149.939	7.08519	15.5738	0.270049	1.45736	5.29826	3.30466	3.55803	0.593957	15.3552	28.7706	3.41234	13.1694	2.83684	0.981548	2.80624	0.468736	2.90814	0.600255	1.67957	0.252519	1.60664	0.256165
15JB46LA	Border lavas	61.8568	141.075	66.7935	0.466369	15.0845	3.7802	0.0445302	0.99097	3.06335	4.48375	1.48135	0.142382	95.9458	3.39039	14.256	15.147	6.56153	48.312	537.9	25.4392	343.186	157.238	7.82668	12.728	1.11842	1.51527	6.09791	4.56097	3.77547	0.709544	17.7889	32.5223	3.56948	12.8668	2.53971	0.789332	2.34904	0.379749	2.34328	0.483957	1.33374	0.194351	1.27802	0.218737
15JB47LA	Border lavas	61.8596	141.063	59.0564	0.767587	17.1734	6.10048	0.0873972	3.31274	6.09274	4.32744	1.31379	0.271161	97.8817	1.25021	46.233	56.232	13.1207	123.552	538.278	21.6052	707.181	152.127	9.82347	17.0539	0.242798	1.07951	3.72582	2.52449	3.59964	0.687288	18.1828	35.8592	4.35684	17.3769	3.61718	1.21487	3.38539	0.530027	3.23789	0.658713	1.81214	0.267497	1.64769	0.25973
Franklin and Marshall XRF - collected by Berkelhammer, Brueseke, Benowitz, Trop, Davis (UTM coordinates zone 12T NAD27 CONUS datum), n =5
Sample	Unit	UTM Easting or Latitude N (deg)	UTM Northing or Longitude W (deg)	SiO2	TiO2	AI2O3	Fe2O3	MnO	MgO	CaO	Na2O	K2O	P2O5	Total	LOI	Ni	Cr	Sc	V	Ba	Rb	Sr	Zr	Nb	Y	U	Th	Pb	La	Ce
SB15-30	Cabin Creek	07 v 0485859	6862309	57.48	1.09	16.35	7.47	0.12	4.39	6.93	4.28	1.4	0.34	99.85	0.63	69	119	17	161	444	29.9	538	205	11	27.6	2	5	<1	21	39
15JB16LA	Rocker Creek	61.8954	141.021	73.94	0.16	15.15	1.7	0.06	0.39	2.01	4.48	1.83	0.08	99.8	2.31	4	18	1	12	960	55.9	434	142	8.5	6.4	1.8	12.6	18	29	38
15JB28LA	Rocker Creek	61.8721	141.026	67	0.53	16.03	4.21	0.08	1.75	3.72	4.87	1.93	0.17	100.29	1.45	12	29	5	60	747	52	413	195	11.8	18.1	2.5	11.9	6	25	41
15JB31LA	Rocker Creek	61.875	141.031	58.4	0.79	16.27	7.02	0.13	6.62	6.66	3.3	0.8	0.18	100.17	1.93	154	305	17	136	463	18.9	598	115	6.1	20.5	<0.5	1.4	28	17	27
15JB41LA	Rocker Creek	61.8788	141.049	64.75	0.58	17.09	4.33	0.07	2.01	4.19	4.36	2.07	0.23	99.68	1.7	12	21	7	85	806	51.2	647	132	8.7	13.3	1.5	2.7	17	20	39
Washington State XRF Samples with LOI > 3% - not reported except in figure 15, age histogram (UTM coordinates zone 12T NAD27 CONUS datum), n = 9																											Washington State ICP-MS
Sample	Unit	UTM Easting or Latitude N (deg)	UTM Northing or Longitude W (deg)	SiO2	TiO2	AI2O3	Fe2O3	MnO	MgO	CaO	Na2O	K2O	P2O5	Total	LOI	Ni	Cr	Sc	V	Ba	Rb	Sr	Zr	Nb	Y	Cs	U	Pb	Th	Hf	Ta	La	Ce	Pr	Nd	Sm	Eu	Gd	Tb	Dy	Ho	Er	Tm	Yb	Lu
SB15-33	Ptarmigan Creek	07 v 0492264	6862027	63.0677	0.36334	15.4313	3.23899	0.0580833	1.73622	4.43475	4.17114	1.39167	0.121225	93.6845	6.11891	39.204	61.578	8.00079	61.578	587.338	30.3046	484.736	92.5803	4.92074	7.87441	0.609289	1.07528	5.60681	2.66093	2.44934	0.413071	12.0892	21.531	2.45157	9.14614	1.82988	0.631108	1.67927	0.252218	1.47591	0.297689	0.76569	0.111639	0.721213	0.110737
SB15-37	Ptarmigan Creek	07 v 0492834	6862336	52.6992	0.888842	18.705	7.43549	0.113642	2.61364	7.68638	3.99824	0.419374	0.421799	94.2241	5.18198	3.267	0	10.1946	119.592	383.598	9.33636	934.792	187.861	10.4152	20.4086	1.20244	0.848061	4.16237	2.39198	4.203	0.656308	22.3515	45.7092	5.61701	23.0172	4.72105	1.59779	4.21824	0.669746	3.90842	0.801271	2.15138	0.317178	1.99408	0.323419
SB15-36	Ptarmigan Creek	07 v 0492812	6862546	53.9058	1.1373	16.7106	7.42364	0.118008	4.33385	7.93799	3.42843	0.703058	0.277289	95.2197	4.72276	45.639	71.082	19.5454	166.32	758.561	11.0142	552.308	234.503	9.75301	27.2319	0.360008	1.61218	5.61618	3.81935	5.37298	0.713728	19.6609	41.045	5.12539	20.8262	4.81028	1.40107	4.94019	0.835611	5.22438	1.05648	2.86884	0.412167	2.66529	0.408114
SB15-50	Young Creek	07 v 0482769	6852721	58.045	1.0194	13.787	7.35933	0.103356	5.30844	6.93055	2.79425	0.300554	0.172795	95.071	4.29699	93.951	160.182	20.0798	136.422	217.612	5.98282	426.386	114.852	4.15825	18.3083	3.00103	0.412668	2.89315	1.041	2.77772	0.299021	9.08903	20.423	2.79755	12.3086	3.09725	1.13086	3.39468	0.570978	3.53911	0.714701	1.94805	0.276746	1.72289	0.268463
15JB49LA	Rocker Creek	61.8925	141.018	57.1434	0.681793	13.8742	4.71551	0.0907929	2.2703	6.76055	4.33152	2.15974	0.207999	91.7555	7.48101	3.861	0.297	8.40127	63.36	571.176	44.0371	962.033	178.65	9.66139	21.5619	0.43768	2.02013	6.98825	4.91966	4.41306	0.738602	18.586	36.6598	4.40543	16.943	3.73756	1.0814	3.65798	0.609513	3.83453	0.805777	2.24586	0.337675	2.16305	0.349098
15JB17LA	Rocker Creek	61.8968	141.023	59.4611	0.602158	15.8862	4.71799	0.0756657	4.1838	5.68299	4.23245	1.19424	0.168062	95.7241	3.93737	86.031	122.067	13.0198	103.653	595.386	21.8791	663.162	96.6186	5.63785	10.3678	0.612598	0.97797	4.98955	2.27758	2.46842	0.41256	13.2499	25.5031	3.08023	11.9799	2.63791	0.861015	2.29132	0.35016	2.03793	0.404103	1.07265	0.153986	0.925387	0.144772
15JB20LA	Rocker Creek	61.9086	141.05	52.1199	1.1055	16.8744	7.52998	0.123401	3.26227	8.1155	4.00649	0.794018	0.334693	93.4992	5.84416	27.0875	39.597	17.6919	156.517	345.735	7.52899	939.821	152.02	8.6166	20.2003	0.0642829	1.06116	3.72983	2.44709	3.62845	0.591788	17.2196	35.7696	4.49487	18.283	4.13344	1.35441	3.94601	0.654221	3.95149	0.782718	2.1	0.314962	1.9299	0.306226
15JB27LA	Rocker Creek	61.8717	141.018	52.1199	1.1055	16.8744	7.52998	0.123401	3.26227	8.1155	4.00649	0.794018	0.334693	93.4992	5.84416	8.712	8.316	6.03778	52.866	641.817	44.1982	347.307	171.293	8.84956	14.2001	0.508053	2.22471	6.89099	5.12077	4.07784	0.789605	19.7087	35.6192	3.90186	13.6737	2.75475	0.837428	2.48558	0.409394	2.56064	0.517831	1.45423	0.223725	1.49153	0.248342
Mini Volcano	Rocker Creek	61.9039	141.092	64.4174	0.444964	15.6937	3.67935	0.0636507	1.78102	4.57186	4.16703	0.999135	0.165766	95.6091	3.79	31.4215	39.4	7.8	66	810.832	22.5605	680.412	105.328	7.07369	8.38899	1.14	1.32	5.99	3.21	2.68	0.55	15.2623	27.3196	3.10242	11.4181	2.25966	0.714534	1.86293	0.285578	1.67006	0.323654	0.839977	0.123438	0.781432	0.120513
